# Supplementary material for: Effectiveness of a five-level Paediatric Triage System: an analysis of resource utilisation in the emergency department in Taiwan
Source: HighWire-hosted journal article supplement (doi:10.1136/emermed-2012-201362), 2012-09-14
Supplement: emermed-2012-201362supp_Appendix.pdf [file emermed-2012-201362supp_Appendix.pdf]

Appendix A. Explicit threshold levels for hemodynamic instability indicating acuity level 1

---

*Respiration*

Respiratory rate < 10 /min

O<sub>2</sub>sat < 90%

*Circulation*

HR>200/min or < 100/min for age < 3M

HR>180/min or < 80/min for age 3M-3Y

HR>150/min or < 60/min for age >3Y

SBP < 70 mmHg

*Body temperature*

BT> 41°C

BT< 32°C

---
